1 **Psychological outcomes of 12-15 year olds with gender dysphoria receiving pubertal suppression:**  
2 **assessing reliable change and recovery**

3

4 **Short title: Psychological outcomes of puberty blockers**

5

6 Professor Susan McPherson

7 School of Health and Social Care

8 University of Essex

9 Colchester CO4 3SQ, UK

10

11 David E.P. Freedman

12 Independent Researcher

13 London, UK

14

15

**NOTE: This preprint reports new research that has not been certified by peer review and should not be used to guide clinical practice.**

16 **Abstract**

17 In 2021 the results of the first UK study of GnHRA treatment in young adolescents was published.  
18 Based on means testing alone, the study found no deterioration in psychological wellbeing. The aim  
19 of the current study is to re-analyse the data to assess Reliable Change and Recovery rates in order  
20 to assess individual level change and provide a more accurate assessment of treatment risks. The  
21 data from the original uncontrolled prospective observational study were collected within a national  
22 specialist service for children with gender dysphoria. Participants were 44 12-15 year olds diagnosed  
23 with gender dysphoria meeting pre-specified eligibility criteria for GnHRA treatment. Puberty was  
24 suppressed using “triptorelin”; participants were followed-up for 36 months. A range of outcomes  
25 was assessed including response to pubertal suppression; bone health; adverse events; and  
26 psychological outcomes. Because the primary justification for use of GnHRA treatment in this age  
27 group is to relieve psychological distress caused by onset of puberty, our analysis focuses on general  
28 psychopathology measured by the Child Behaviour Checklist and Youth Self Report form. Contrary  
29 to conclusions of the original study, our results indicate that between 15% and 34% of participants  
30 reliably deteriorated depending on the subscale and time point. Relatively few participants fell into  
31 the borderline or clinical range at baseline (37%-58% depending on the scale and time point);  
32 recovery rates were low and fell to zero on both self-report and parent-report at 36 months. Rates  
33 of reliable deterioration as well as recovery rates were comparatively worse than typical child and  
34 adolescent mental health services where recovery rates of around 50% are found. These findings are  
35 concerning and indicate an urgent need to re-evaluate conclusions drawn from the original study  
36 and for more detailed analysis of outcomes to inform ongoing use of GnHRA treatment in young  
37 adolescents in the UK.

38

39

40

41

## 42 **Introduction**

43

44 The UK Gender Identity Development Service (GIDS) was established in 1989 providing therapeutic  
45 assessment and psychological intervention for children and young people experiencing gender  
46 dysphoria (GD). An early audit of the service by the current authors found that of the first 124  
47 referrals to the service, the majority had complex social and/or psychological difficulties in addition  
48 to gender dysphoria [1]. At that time, GIDS was based on a psychotherapeutic service model based  
49 within an NHS specialist mental health Trust in London. When children reached adulthood (at least  
50 16) and wanted to pursue medical interventions such as puberty blockers, cross-sex hormones or  
51 surgery, they would be referred to adult services in a hospital setting. In 2009 the service  
52 commissioning structure at GIDS changed from a London based service receiving extra-contractual  
53 referrals on a case-by-case basis to a nationally commissioned specialist service [2]. Referrals began  
54 to rapidly increase seeing a 2800% increase from 2009 to 2019 [2] while levels of complex social and  
55 psychological difficulties in the client group remained high [3].

56

57 Puberty blockers (GnRHa treatment) are a form of medical intervention, licenced for use to retard  
58 puberty in young people with precocious puberty, that have additionally been prescribed for people  
59 experiencing GD which had previously been restricted to those aged 16 years and over. The  
60 intervention had been trialled on younger children in the Netherlands since the late 1990s [4].  
61 Pressure from patient groups to introduce the treatment for younger children in the UK grew [2].  
62 From around 2009 a number of countries including USA and Australia began to permit its use in this  
63 younger age group [5] and in 2009 the British Society of Endocrinology and Diabetes published a  
64 statement advocating their use in a cautious and carefully managed way, monitored within a  
65 research context [2]. In 2011, GIDS applied for ethical approval to trial the treatment in children  
66 aged 12 to 15 within the context of a research study.

67

68 The proposed study received ethical approval from the UK National Research Ethics Service in 2011  
69 and recruitment of participants took place from 2011 to 2014 [5]. The aims of the study were “to  
70 evaluate the benefits and risks for physical and mental health and wellbeing of mid-pubertal  
71 suppression in adolescents with GD; to add to the evidence base regarding the efficacy of GnRHa  
72 treatment for young people with GD; and to evaluate continuation and discontinuation of GD and  
73 the continued wish for gender reassignment within this group”. The study assessed physical  
74 response to pubertal suppression; bone health; adverse events; and psychological outcomes.  
75 Psychological outcomes included general psychopathology, self-harm, quality of life, body image,  
76 GD, general functioning and patient experience. General psychopathology was assessed using the  
77 Child Behaviour Checklist (CBCL, parent report) and the Youth Self Report Form (YSR, self-report).  
78 These are validated measures which have been widely used internationally to assess children’s  
79 mental health [6] and are arguably the most reliable indicator of general mental health among the  
80 outcomes assessed in the study.

81  
82 The main argument for the introduction of puberty blockers in the UK for this age group had been  
83 on the grounds of their potential to relieve psychological distress.

84  
85 *“A key purpose of GnRHa treatment is to pause puberty, to avoid a deterioration in wellbeing*  
86 *and allow for further exploration of a young person’s feelings about their gender identity and*  
87 *their wishes for the future, without the pressure or distress which may come from further*  
88 *unwanted bodily changes” [7]*

89  
90 There were, however, unknown risks of treatment. The participant information leaflet [8] referred to  
91 a number of risks including the potential to limit bone strength, sexual development, height, fertility  
92 along with impacts on memory and concentration. Introducing a medical intervention for children  
93 with such serious risks was balanced against the potential for psychological benefit. Our focus in the

94 current paper is therefore on psychological outcomes of children receiving this intervention as  
95 measured by the general psychopathology indicators (CBCL and YSR).

96

97 The GIDS study was an uncontrolled pre-post design. Children meeting the eligibility criteria were  
98 referred by GIDS to University College London Hospital NHS Foundation Trust between 2011-2014,  
99 where study information was given and consent taken. Forty four children consented to take part in  
100 the study. Detailed study procedures are provided in the published paper [5]. Participants were  
101 assessed at baseline, 12 months, 24 months and 36 months. Analysis of psychological outcome data  
102 involved statistical tests to compare differences between mean scores on each subscale at each time  
103 point. This form of analysis falls within the statistical tradition of Null Hypothesis Significance Testing  
104 which involves comparing group means, in this case the same group at different time points.

105

106 “Significance testing almost invariably retards the search for knowledge by producing false  
107 conclusions about research literature” [9]. This is not an unusual or fringe perspective. Similar  
108 concerns have been outlined by key methodologists [10–12]. The central argument is that unlike  
109 natural sciences, when measuring social and psychological constructs, the null hypothesis is never  
110 true: there are always differences between people on these sorts of constructs. As such, evaluation  
111 of both adult and child psychological services in the UK use approaches which examine data at the  
112 level of individual change rather than group means [13,14]. These approaches typically assess two  
113 aspects of individual change: reliable change and clinically significant change, the latter sometimes  
114 referred to as recovery.

115

116 Reliable Change is individual change that is sufficiently unlikely to have arisen by measurement error  
117 alone. The approach provides summary information about what proportion of the sample improve,  
118 deteriorate or stay the same (no change). The formula takes into account the standard error of  
119 difference (before and after treatment) as well as the internal reliability of the measure [15]. The

120 analysis is “applicable, in one form or another, to the measurement of change on any continuous  
121 scale for *any* clinical problem”[15]. The approach can be used with clinical outcome data whether as  
122 part of a controlled or uncontrolled research study, or as part of routine outcome evaluation in a  
123 clinical setting. Clinically significant change or “recovery” refers to the proportion of patients who  
124 are within the clinical or borderline range at baseline, show reliable improvement and move into a  
125 non-clinical range [14].

126

127 The GIDS study had no control group or comparison group, justified on grounds that this was the  
128 only feasible design for this client group (see [https://gids.nhs.uk/research/early-intervention-  
129 study/](https://gids.nhs.uk/research/early-intervention-study/)). The analysis therefore consisted of comparing the mean scores from the same group of  
130 individuals at different time points. The authors indicate that the analysis was designed “to minimise  
131 the likelihood of chance findings due to the large number of outcomes and small sample size” [5].  
132 This means that the number of statistical tests was limited and some outcomes had to be analysed in  
133 broad groups with no sub-group analyses, such as by natal sex. Analysis of Reliable Change and  
134 Clinically Significant Change are not hampered by issues of multiple testing and is suitable for small  
135 or large samples.

136

137 The GIDS study found no statistical differences on the CBCL or YSR between time points, concluding  
138 that either puberty blockers “brought no measurable benefit nor harm to psychological function”; or  
139 that “treatment reduced [the] normative worsening of problems”. The latter conclusion is based on  
140 evidence that psychological problems as measured by the YSR and CBCL tend to worsen during early  
141 adolescence. However, the evidence cited comes from non-clinical populations (Verhulst, 2003).  
142 Children who attend GIDS are a clinical population [1,3], with a similar range of social and  
143 psychological problems to those seen in CAMHS populations. Moreover, the children in the GIDS  
144 study were ostensibly receiving mental health support from the GIDS service in a therapeutic setting,  
145 making them a clinical population by definition. A reasonable benchmark is therefore the UK CAMHS

146 population rather than non-clinical populations. In this paper we argue that neither of the study's  
147 conclusions is accurate, because the analysis did not take account of individual level change as is  
148 standard practice when evaluating CAMHS services in the UK, nor did the authors benchmark their  
149 interpretations against CAMHS psychological outcomes.

150

151 Data from the GIDS study were lodged at the UK Data Archive [8] and can be downloaded for  
152 researcher use without any further additional ethical approval required. The aim of the current  
153 study was therefore to re-analyse the data from the GIDS study to assess Reliable Change and  
154 Recovery rates on the CBCL and YSR for the sample at 12, 24 and 36 months follow-up.

155

## 156 **Methods**

157

158 Study data were anonymised and lodged at the UK Data Archive in a format suitable for use with no  
159 further ethical approval or consent required, as agreed with the Health Research Authority [8].

160 Please see the original publication for more detailed information on study methodology and further  
161 details on the ethic approval which was obtained from the National Research Ethics Service (NRES:  
162 reference 10/H0713/79) in February 2011 [5]. Subsequently, the team had discussions with the  
163 Health Research Authority who provided permission for data to be deposited with the UK Data  
164 Archive on the condition that sensitive data was removed to minimise disclosure risk of personal  
165 information [5].

166

167 The study data were downloaded and converted to Excel. The data deposited were standardised for  
168 age and sex and included individual level scores for CBCL Externalising, CBCL Internalising, CBCL Total  
169 Problems, YSR Externalising, YSR Internalising and YSR Total Problems. These sub-scales are “higher-  
170 order” subscales which combine other subscales into broad dimensions [6]. The Internalising domain  
171 is considered a measure of general emotional problems including anxiety, depression, somatic

172 complaints and being withdrawn. The Externalising domain is considered an aggregate scale of  
173 behavioural problems including attention problems and aggressive behaviour. The Total Problems  
174 score is considered an aggregate of emotional and behavioural problems as well as sleep difficulties  
175 [16]. The scales have published reliability data reporting good internal reliability with Chronbach  
176 alphas ranging from 0.90 to 0.97 [6]. The scales come from a broad system of measures (ASEBA)  
177 developed in the USA which have been widely used with published norms and reliability data and  
178 clinical cut-offs for all versions. Established cut-points are <60 (normal range), 60-63 (borderline  
179 range) and >63 (clinical range) [6].

180

181 The Reliable Change Index (RCI) for each sub-scale was calculated using the formula provided by  
182 Evans, Margison and Barkham using Chronbach alpha as the reliability criterion [15]. Using the RCI,  
183 we calculated the proportion of participants in each of the three categories: No change, Deteriorate.  
184 Improve.

185

186 Recovery (clinically significant change) was calculated using the published clinical cut-points.

187 Following Gibbons, Harrison and Stallard [14], participants who scored in the borderline or clinical  
188 range at baseline (greater than or equal to 60) were included in the analysis of clinically significant  
189 change. Of those meeting this criterion, we calculated the proportion who had moved into the  
190 normal range at each time point.

191

192

## 193 **Results**

194

195 The findings for Reliable Change and recovery are presented below by Internalising Problems (Table  
196 1), Externalising Problems (Table 2) and Total Problems (Table 3). Data indicate that across all scales  
197 with both self-report (YSR) and parent report (CBCL), the majority of participants experience no



198 reliable change in distress across all time points. Between 15% and 34% deteriorate and between 9%  
 199 and 20% reliably improve.

200

201 There are relatively small numbers of participants in the clinical range at baseline: roughly 40-60% of  
 202 the overall sample, depending on the scale. Rates of reliable recovery range from 0% to 45%  
 203 depending on the scale and time point.

204

205 Table 1: CBCL and YSR Internalising Scales – reliable change and reliable recovery

206

| <u>CBCL Internalising</u>             |                    |        |        | <u>YSR Internalising</u>              |                    |        |
|---------------------------------------|--------------------|--------|--------|---------------------------------------|--------------------|--------|
| Reliable change                       | 12m                | 24m    | 36m    | Reliable change                       | 12m                | 24m    |
| No change                             | 68%                | 60%    | 64%    | No change                             | 56%                | 67%    |
| Deteriorate                           | 20%                | 20%    | 27%    | Deteriorate                           | 29%                | 20%    |
| Improve                               | 12%                | 20%    | 9%     | Improve                               | 15%                | 13%    |
| N                                     | 41                 | 20     | 11     | N                                     | 41                 | 15     |
| Clinical/borderline range at baseline | Reliably recovered |        |        | Clinical/borderline range at baseline | Reliably recovered |        |
| 24/43 (56%)                           | 2 (8%)             | 1 (4%) | 0 (0%) | 20/44 (45%)                           | 3 (15%)            | 0 (0%) |

207

208

209

210

211 Table 2: CBCL and YSR Externalising Scales – reliable change and reliable recovery

212

| <b><u>CBCL Externalising</u></b>      |                    |        |        | <b><u>YSR Externalising</u></b>       |                    |        |
|---------------------------------------|--------------------|--------|--------|---------------------------------------|--------------------|--------|
| Reliable change                       | 12m                | 24m    | 36m    | Reliable change                       | 12m                | 24m    |
| No change                             | 66%                | 70%    | 64%    | No change                             | 61%                | 67%    |
| Deteriorate                           | 15%                | 15%    | 18%    | Deteriorate                           | 22%                | 20%    |
| Improve                               | 20%                | 15%    | 18%    | Improve                               | 17%                | 13%    |
| N                                     | 41                 | 20     | 11     | N                                     | 41                 | 15     |
| Clinical/borderline range at baseline | Reliably recovered |        |        | Clinical/borderline range at baseline | Reliably recovered |        |
| 16/43 (37%)                           | 4 (25%)            | 1 (6%) | 1 (6%) | 12/44 (27%)                           | 2 (17%)            | 0 (0%) |

213

214

215

216

217

218

219

220

221

222

223

224 Table 3: CBCL and YSR Total Scales – reliable change and reliable recovery

225

| <u>CBCL Total</u>                     |                    |        |        | <u>YSR Total</u>                      |                    |        |
|---------------------------------------|--------------------|--------|--------|---------------------------------------|--------------------|--------|
| Reliable change                       | 12m                | 24m    | 36m    | Reliable change                       | 12m                | 24m    |
| No change                             | 49%                | 60%    | 55%    | No change                             | 37%                | 60%    |
| Deteriorate                           | 29%                | 20%    | 18%    | Deteriorate                           | 34%                | 27%    |
| Improve                               | 22%                | 20%    | 27%    | Improve                               | 29%                | 13%    |
| N                                     | 41                 | 20     | 11     | N                                     | 41                 | 15     |
| Clinical/borderline range at baseline | Reliably recovered |        |        | Clinical/borderline range at baseline | Reliably recovered |        |
| 25/43 (58%)                           | 4 (16%)            | 2 (8%) | 0 (6%) | 19/44 (43%)                           | 6 (32%)            | 0 (0%) |

226

227

228 **Discussion**

229

230 The GIDS Early Intervention Study authors claim that the study findings indicate there is no  
 231 deterioration in psychological wellbeing for these 12-15 year olds using puberty blockers [5]. This  
 232 conclusion was based on a statistical analysis comparing means at different time points. However,  
 233 this is not a suitable analysis to show the effect of the treatment on individuals in the study and does  
 234 not allow for comparison with other clinical populations experiencing psychological distress.

235

236 Our analysis indicates that, broadly speaking, for Internalising and Externalising Problems, 56%-68%  
237 experience no reliable change in distress across time points and although there is some variation,  
238 proportions do not appear markedly different between self-report and parent report. Between 15%  
239 and 29% deteriorate; and between 9% and 20% reliably improve. The Total Problems scale shows  
240 even higher proportions deteriorating (20%-34% depending on timepoint).

241  
242 A rate of around 20% reliable improvement is not dissimilar to other CAMHS service evaluations. For  
243 example, using a similar global scale of psychopathology (RCADS), Gibbons, Harrison and Stallard  
244 [14] found between 20.7% and 24.4% of their sample reliably improved. However, the same study  
245 found that nearly all of the remaining participants showed No Change with only a very small  
246 proportion (0.7% - 5.7%) deteriorating. These proportions were similar for a range of other  
247 psychological outcome variables used[14]. Comparatively high levels of deterioration in the GIDS  
248 sample (ranging from 15-34%) is therefore very concerning. Note that the highest rate of  
249 deterioration (34%) is seen in the self-report scale at 12 months and only slightly reduces by 24  
250 months to 27%.

251  
252 Relatively few participants fell into the borderline or clinical range at baseline (37%-58% depending  
253 on the scale). This is lower than a typical CAMHS population; Gibbons, Harrison and Stallard found  
254 around 90% of their sample to be in the clinical or borderline range at baseline[14]. This suggests  
255 that the GIDS participants were less likely to be significantly distressed when they were referred to  
256 the clinic than typical CAMHS referrals and may indicate a relatively low referral threshold operating  
257 at the time period studied.

258  
259 Given the relatively low proportion of the sample in the clinical or borderline range, the recovery  
260 rates should be treated cautiously. Nevertheless, a notable finding is that there is a tendency for  
261 parent report and self-report to show a discrepancy in recovery rates with self-report scores

262 indicating a higher rate of recovery after 12 months (around 25-45%). However, this discrepancy  
263 reduces over time so that at the later measurement points, self-report and parent report recovery  
264 rates converge at zero or near to zero. CAMHS services typically see recovery rates around 50% [14]  
265 and therefore the recovery rates seen in the GIDS sample are worryingly low, particularly given the  
266 rates fall to zero over a prolonged period (3 years).

267  
268 Best interest decisions about treatments for children with significant risks to current and future  
269 physical health are normally taken on a balance of risks, that the treatment improves some other  
270 important aspect of wellbeing or health. The argument for use of puberty blockers in this age group  
271 was that they relieve psychological distress. Yet these data indicate that while reliable improvement  
272 rates are similar to CAMHS services, deterioration rates are considerably higher than in CAMHS  
273 services and reliable recovery rates considerably lower, reducing over time. This raises serious  
274 questions about the balance of risk.

275  
276 In light of this analysis, the service should urgently conduct fuller analysis to ascertain whether there  
277 are any variables which might predict which 20% of children with GD are most likely to benefit  
278 psychologically and who are most likely to deteriorate. If there is a lack of robust data to conduct  
279 statistical modelling, this could at the very least consist of observation of patterns of individual  
280 change, taking into account demographic variables available including natal sex.

281  
282 The GIDS study design was, in effect, a service evaluation conducted under the auspices of research  
283 ethics. Referrals for puberty blockers became routine practice in GIDS 2014 (Barnes, 2023), 7 years  
284 before the findings of the study were published. It would be expected therefore that the service  
285 would have continued to collect routine outcome data, as is expected across all UK CAMHS and IAPT  
286 CYP services and was standard practice in the CAMHS service in the Trust where the service was  
287 based. It should therefore be straightforward to also analyse a much larger data set of psychological

288 outcomes using the Reliable Change Index and clinically significant change approach to provide a  
289 more helpful picture of the impact of puberty blockers at the level of individual change. It should  
290 also be possible to analyse routinely collected outcome data for children who did not take up  
291 puberty blockers to generate comparable data on Reliable Change and recovery as a naturalistic  
292 control group. We recommend that the service conduct such an analysis urgently to inform the  
293 development of policy for new gender services being established in the UK.

294

### 295 **Strengths and limitations**

296 This is the first analysis of UK data on children aged 12-15 with GD taking puberty blockers  
297 demonstrating individual level change as opposed to testing differences between group averages. As  
298 such this analysis gives a much fuller picture of the benefits and risks of treatment. However, the  
299 analysis is limited by absence of UK norms for the measures used combined with the lack of a study  
300 control group to provide local norms; clinical cut points used were based on US normative data and  
301 it is possible that UK teenagers may present differently to US teenagers in respect of GD. The  
302 analysis is also limited by the limitations of the data set available for re-analysis which lacks  
303 differentiation by sex and item level data to look at more fine grained sub-scales.

304

### 305 **References**

306

- 307 1. Di Ceglie D, Freedman D, McPherson S, Richardson P. Children and adolescents referred to a  
308 specialist gender identity development service: Clinical features and demographic  
309 characteristics. *Int J Transgenderism*. 2002;6.
- 310 2. Barnes H. *Time to Think: The Inside Story of the Collapse of the Tavistock's Gender Service for*  
311 *Children*. London: Swift Press; 2023.
- 312 3. Holt V, Skagerberg E, Dunsford M. Young people with features of gender dysphoria:  
313 Demographics and associated difficulties. *Clin Child Psychol Psychiatry*. 2016;21: 108–118.

- 314 doi:10.1177/1359104514558431
- 315 4. Cohen-Kettenis PT, van Goozen SHM. Pubertal delay as an aid in diagnosis and treatment of a  
316 transsexual adolescent. *Eur Child Adolesc Psychiatry*. 1998;7: 246–248.  
317 doi:10.1007/s007870050073
- 318 5. Carmichael P, Butler G, Masic U, Cole TJ, De Stavola BL, Davidson S, et al. Short-term  
319 outcomes of pubertal suppression in a selected cohort of 12 to 15 year old young people with  
320 persistent gender dysphoria in the UK. Santana GL, editor. *PLoS One*. 2021;16: e0243894.  
321 doi:10.1371/journal.pone.0243894
- 322 6. Achenbach TM, Rescorla LA. *Manual for the ASEBA School-Age Forms & Profiles*. Burlington,  
323 VT: University of Vermont, Research Center for Children, Youth, & Families; 2001.
- 324 7. Gender Identity Development Service. *The Early Intervention Study*. Available:  
325 <https://gids.nhs.uk/research/early-intervention-study>
- 326 8. Carmichael P, Butler G, Masic U, Cole TJ, De Stavola BL, Davidson S, et al. Short-term  
327 outcomes of pubertal suppression in a selected cohort of 12 to 15 year old young people with  
328 persistent gender dysphoria in the UK 2019-2021 [Data Collection]. Colchester, Essex: UK  
329 Data Service; 2021. doi:10.5255/UKDA-SN-854413
- 330 9. Schmidt F, Hunter J. Are there benefits from NHST? *Am Psychol*. 2002;57: 65–66.  
331 doi:10.1037/0003-066X.57.1.65
- 332 10. Meehl PE. Theory-Testing in Psychology and Physics: A Methodological Paradox. *Philos Sci*.  
333 1967;34: 103–115. doi:10.1086/288135
- 334 11. Clark-Carter D. Effect size: The missing piece of the jigsaw. *Psychologist*. 2003;16: 636–638.
- 335 12. Field A, Wright D. A bluffer’s guide to effect sizes. *PsyPAG Q*. 2006;58: 9–23.
- 336 13. Wolpert M, Jacob J, Napoleone E, Whale A, Calderon A, Edbrooke-Childs J. *Child- and Parent-*  
337 *Reported Outcomes and Experience from Child and Young People’s Mental Health Services*

- 338 2011–2015. Child Outcomes Research Consortium; 2016. Available:  
339 [https://www.corc.uk.net/media/1544/0505207\\_corc-report\\_for-web.pdf](https://www.corc.uk.net/media/1544/0505207_corc-report_for-web.pdf)
- 340 14. Gibbons N, Harrison E, Stallard P. Assessing recovery in treatment as usual provided by  
341 community child and adolescent mental health services. *BJPsych Open*. 2021;7: e87.  
342 doi:10.1192/bjo.2021.44
- 343 15. Evans C, Margison F, Barkham M. The contribution of reliable and clinically significant change  
344 methods to evidence-based mental health. *Evid Based Ment Health*. 1998;1: 70–72.  
345 doi:10.1136/ebmh.1.3.70
- 346 16. Guerrera S, Menghini D, Napoli E, Di Vara S, Valeri G, Vicari S. Assessment of  
347 Psychopathological Comorbidities in Children and Adolescents With Autism Spectrum  
348 Disorder Using the Child Behavior Checklist. *Front Psychiatry*. 2019;10.  
349 doi:10.3389/fpsy.2019.00535
- 350
- 351
